# Supplementary material
Source: publisher figshare collection journal article supplement (https://future-science-group.figshare.com/ndownloader/files/34123356)
Supplement: Supplementary file 1 [file 34123356]

# Supplementary materials


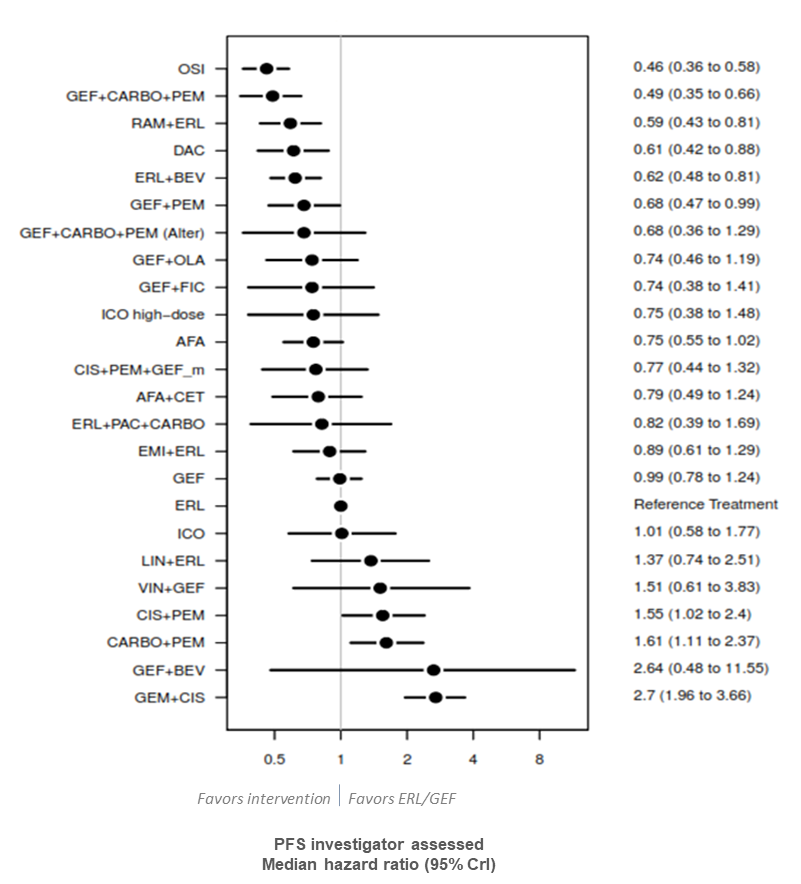


## **Figure A1. Sensitivity analysis of PFS splitting the erlotinib and gefitinib node (random effects).**

AFA: afatinib; BEV: bevacizumab; CARBO: carboplatin; CET: cetuximab; CIS: cisplatin; CrI: credible interval; DAC: dacomitinib; EMI: emibutazumab; ERL: erlotinib; FIC: ficlatuzumab; GEF: gefitinib; GEF_m: gefitinib maintenance; GEM: gemcitabine; ICO: icotinib; LIN: linsitinib; OLA: olaparib; OSI: osimertinib; PAC: paclitaxel; PEM: pemetrexed; PFS: progression-free survival; RAM: ramucirumab; VIN: Vinorelbine


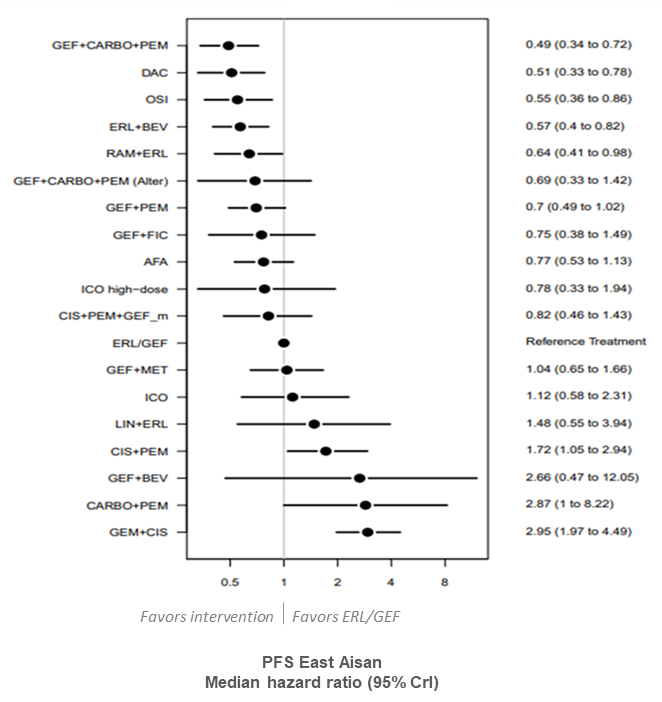


## **Figure A2. Subgroup analysis of PFS of treatments versus erlotinib/gefitinib in East Asian patients (random effects).**

AFA: afatinib; BEV: bevacizumab; CARBO: carboplatin; CIS: cisplatin; CrI: credible interval; DAC: dacomitinib; ERL: erlotinib; FIC: ficlatuzumab; GEF: gefitinib; GEF_m: gefitinib maintenance; GEM: gemcitabine; ICO: icotinib; LIN: linsitinib; MET: Metformin; OSI: osimertinib; PEM: pemetrexed; PFS: progression-free survival; RAM: ramucirumab.


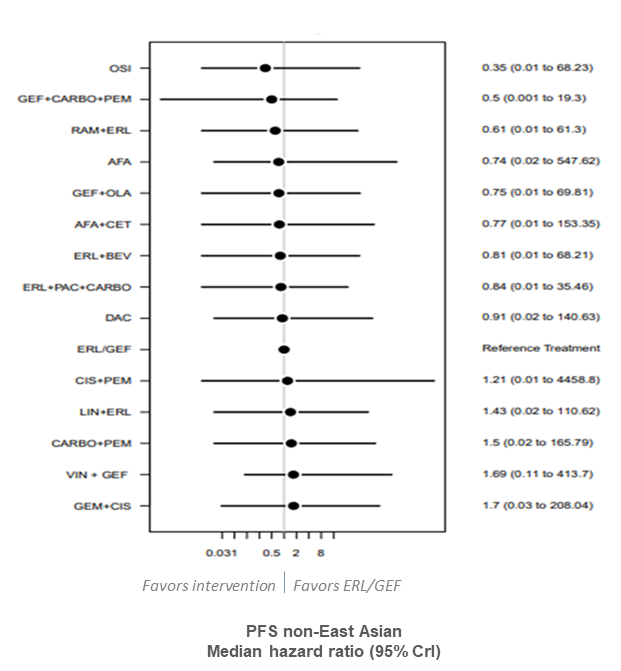


## **Figure A3. Subgroup analysis of PFS of treatments versus erlotinib/gefitinib in non-East Asian patients (random effects).**

AFA: afatinib; BEV: bevacizumab; CARBO: carboplatin; CET: cetuximab; CIS: cisplatin; CrI: credible interval; DAC: dacomitinib; ERL: erlotinib; GEF: gefitinib; GEM: gemcitabine; LIN: linsitinib; OLA: olaparib; OSI: osimertinib; PAC: paclitaxel; PEM: pemetrexed; PFS: progression-free survival; RAM: ramucirumab; VIN: Vinorelbine.


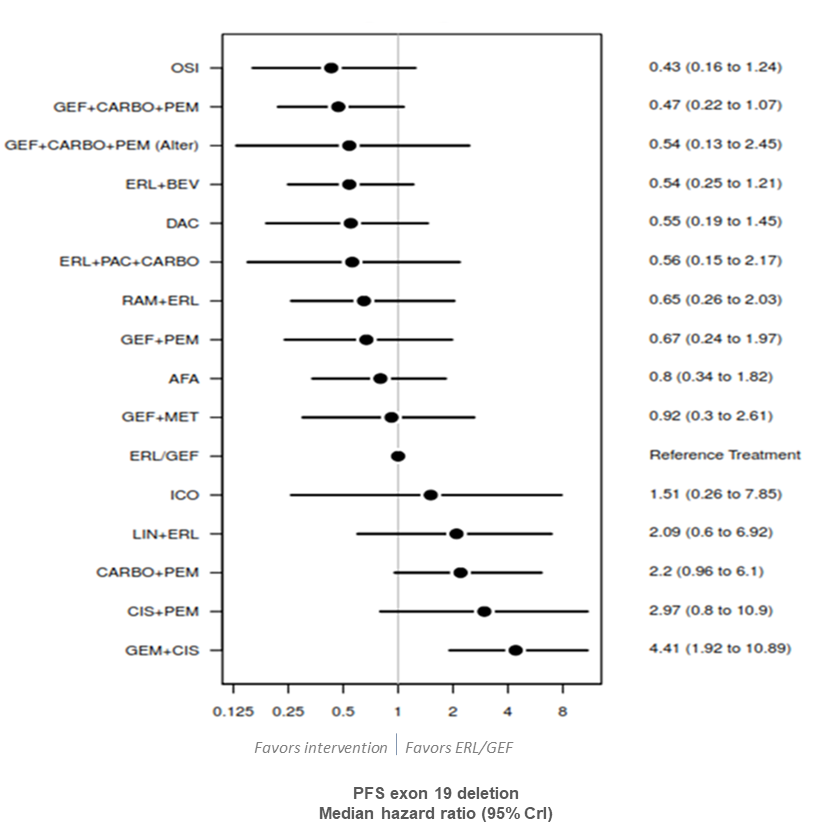


## **Figure A4. Subgroup analysis of PFS of treatments versus erlotinib/gefitinib in exon 19 deletion patients (random effects).**

AFA: afatinib; BEV: bevacizumab; CARBO: carboplatin; CI: confidence interval; CIS: cisplatin; CrI: credible interval; DAC: dacomitinib; ERL: erlotinib; GEF: gefitinib; GEM: gemcitabine; ICO: icotinib; LIN: linsitinib; MET: Metformin; OSI: osimertinib; PAC: paclitaxel; PEM: pemetrexed; PFS: progression-free survival; RAM: ramucirumab.


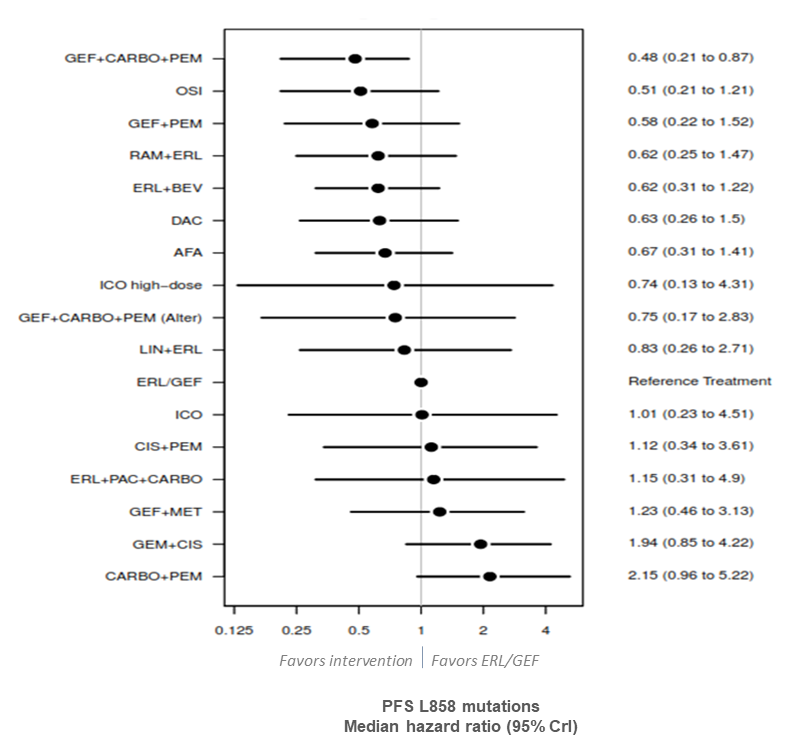


## **Figure A5. Subgroup analysis of PFS of treatments versus against erlotinib/gefitinib in patients with L858 mutations (random effects).**

AFA: afatinib; BEV: bevacizumab; CARBO: carboplatin; CIS: cisplatin; CrI: credible interval; DAC: dacomitinib; ERL: erlotinib; GEF: gefitinib; GEM: gemcitabine; ICO: icotinib; LIN: linsitinib; MET: Metformin; OSI: osimertinib; PAC: paclitaxel; PEM: pemetrexed; PFS: progression-free survival; RAM: ramucirumab.


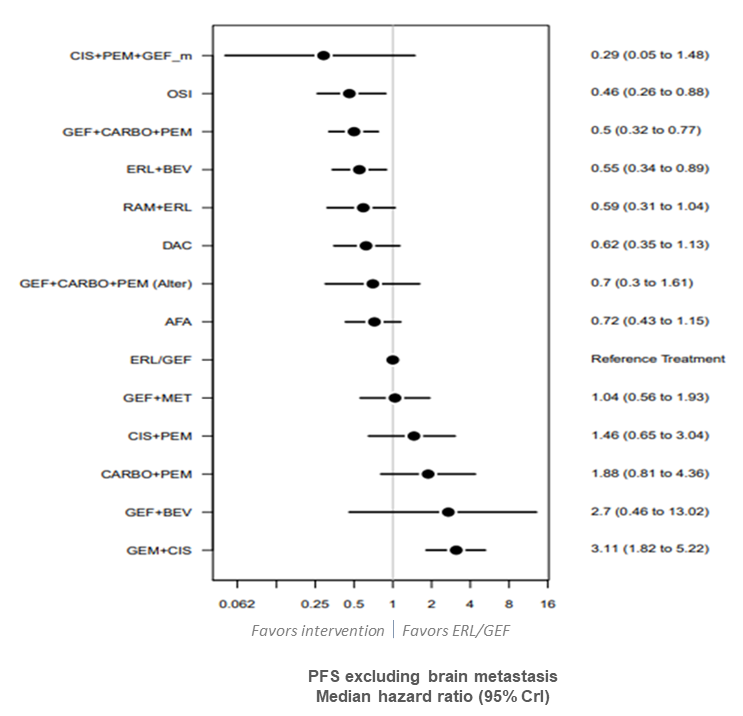


## **Figure A6. Subgroup analysis of PFS of treatments versus erlotinib/gefitinib excluding brain metastasis (random effects).**

AFA: afatinib; BEV: bevacizumab; CARBO: carboplatin; CIS: cisplatin; CrI: credible interval; DAC: dacomitinib; ERL: erlotinib; GEF: gefitinib; GEF_m: gefitinib maintenance; GEM: gemcitabine; MET: Metformin; OSI: osimertinib; PEM: pemetrexed; PFS: progression-free survival; RAM: ramucirumab.


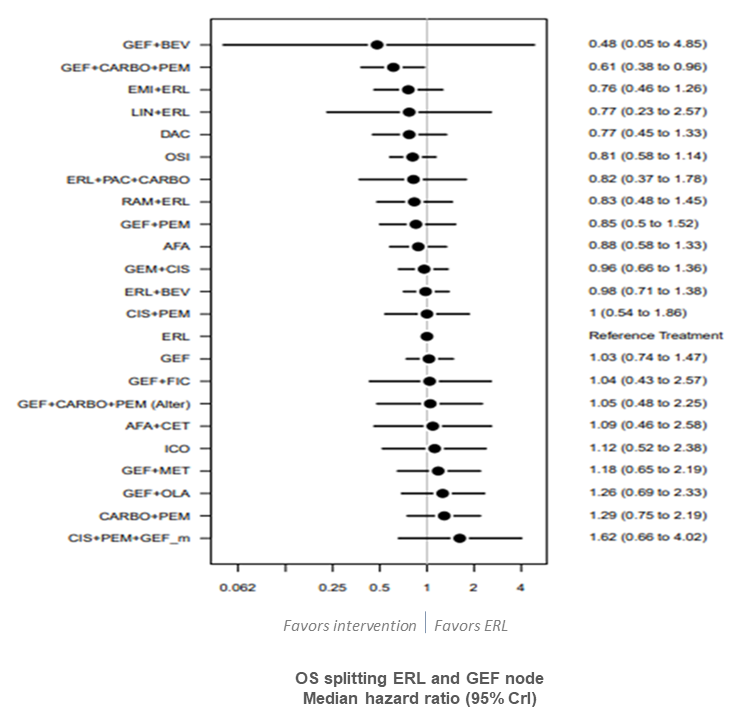


## **Figure A7. Sensitivity analysis of OS splitting the erlotinib and gefitinib node (random effects).**

AFA: afatinib; BEV: bevacizumab; CARBO: carboplatin; CET: cetuximab; CIS: cisplatin; CrI: credible interval; DAC: dacomitinib; EMI: Emibutazumab; ERL: erlotinib; FIC: ficlatuzumab; GEF: gefitinib; GEF_m: gefitinib maintenance; GEM: gemcitabine; ICO: icotinib; LIN: linsitinib; MET: Metformin; OLA: olaparib; OS: overall survival; OSI: osimertinib; PAC: paclitaxel; PEM: pemetrexed; RAM: ramucirumab.


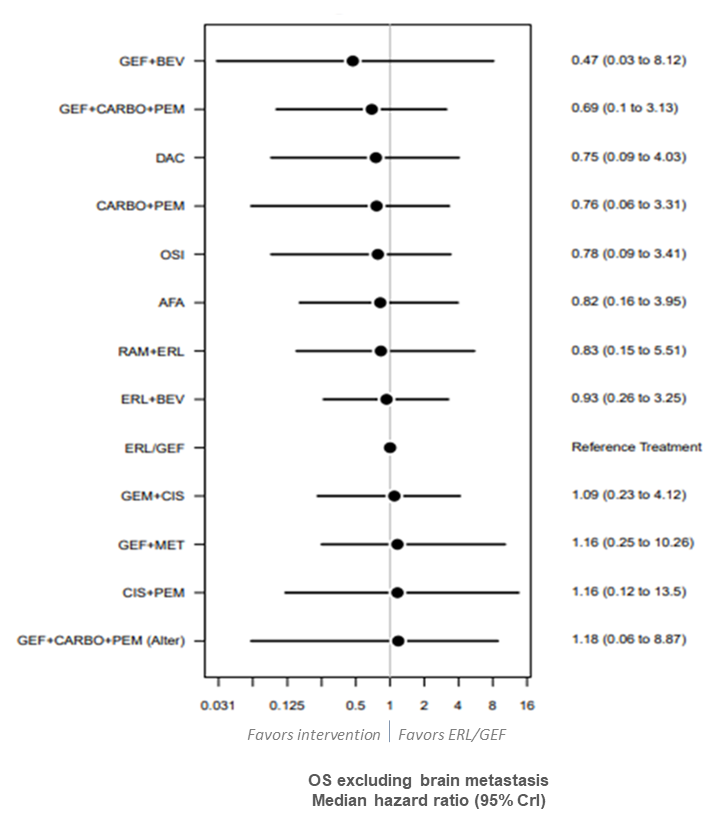


## **Figure A8. Subgroup analysis of OS of treatments versus erlotinib/gefitinib excluding brain metastasis (random effects).**

AFA: afatinib; BEV: bevacizumab; CARBO: carboplatin; CIS: cisplatin; CrI: credible interval; DAC: dacomitinib; ERL: erlotinib; GEF: gefitinib; GEF_m: gefitinib maintenance; GEM: gemcitabine; MET: Metformin; OS: overall survival; OSI: osimertinib; PEM: pemetrexed; RAM: ramucirumab.


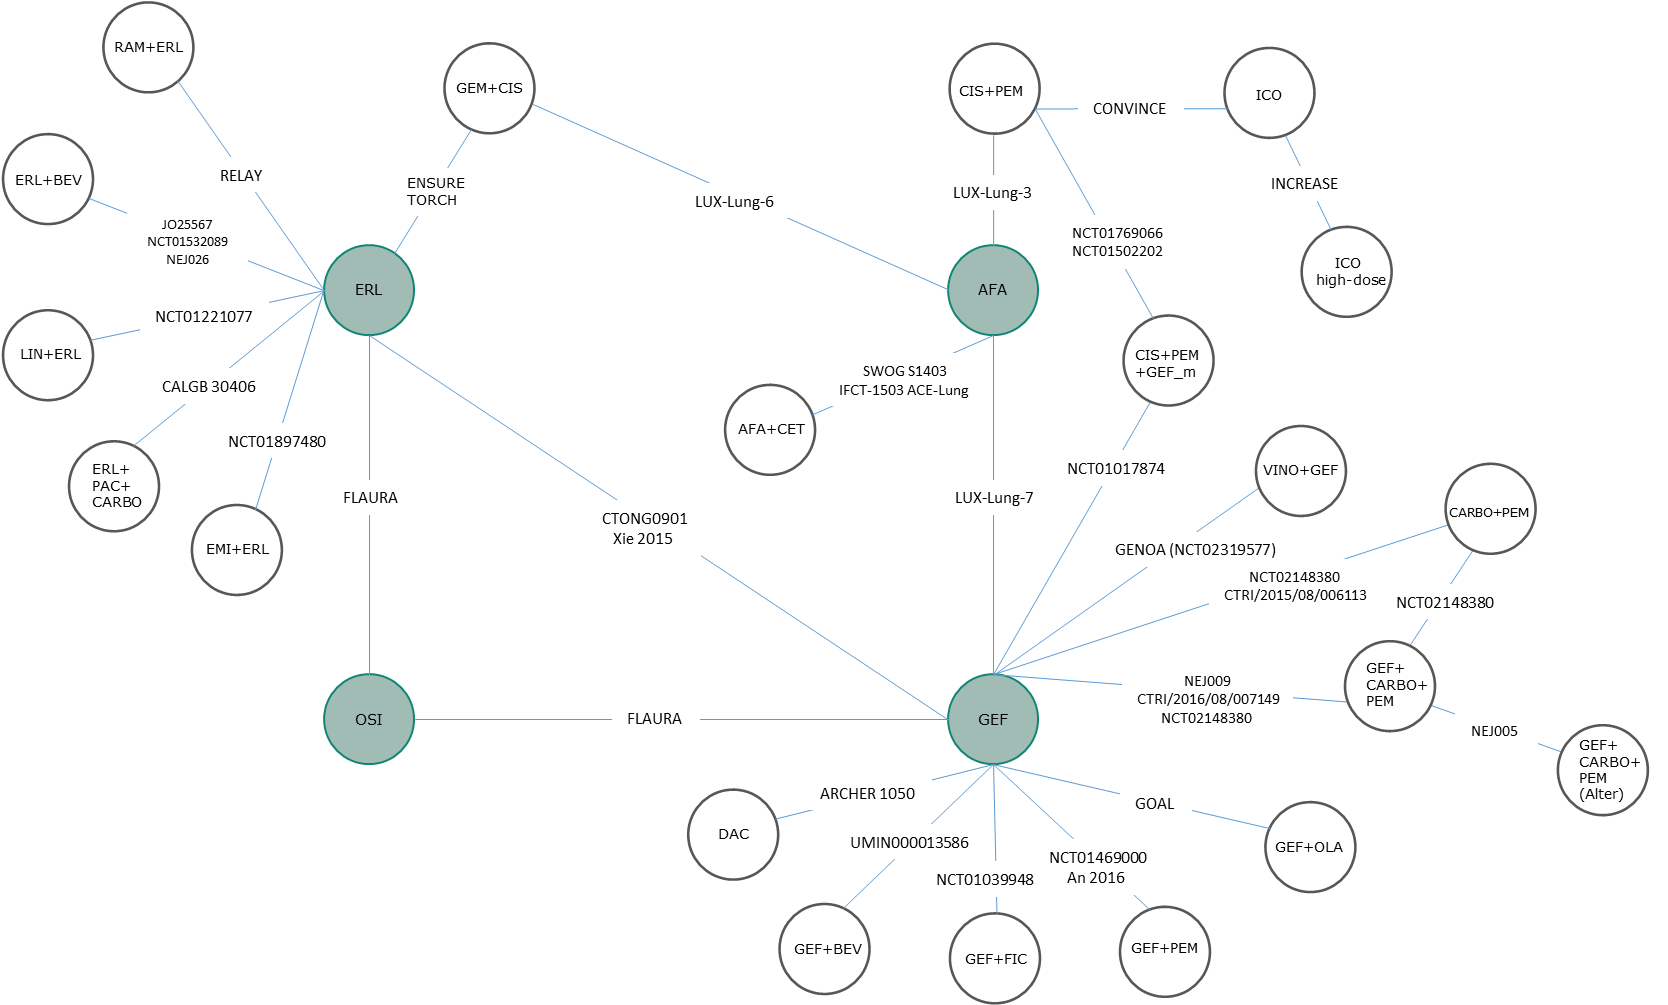


## **Figure A9. Evidence network for sensitivity analysis splitting ERL and GEF nodes for PFS**

AFA: afatinib; BEV: bevacizumab; CARBO: carboplatin; CET: cetuximab; CIS: cisplatin; DAC: dacomitinib; EMI: Emibetuzumab; ERL: erlotinib; FIC: ficlatuzumab; GEF: gefitinib; GEF_m: gefitinib maintenance; GEM: gemcitabine; ICO; icotinib; LIN: linsitinib; OLA: olaparib; OSI: osimertinib; PAC: paclitaxel; PEM: pemetrexed; PFS: progression-free survival; RAM: ramucirumab; VIN: vinorelbine.


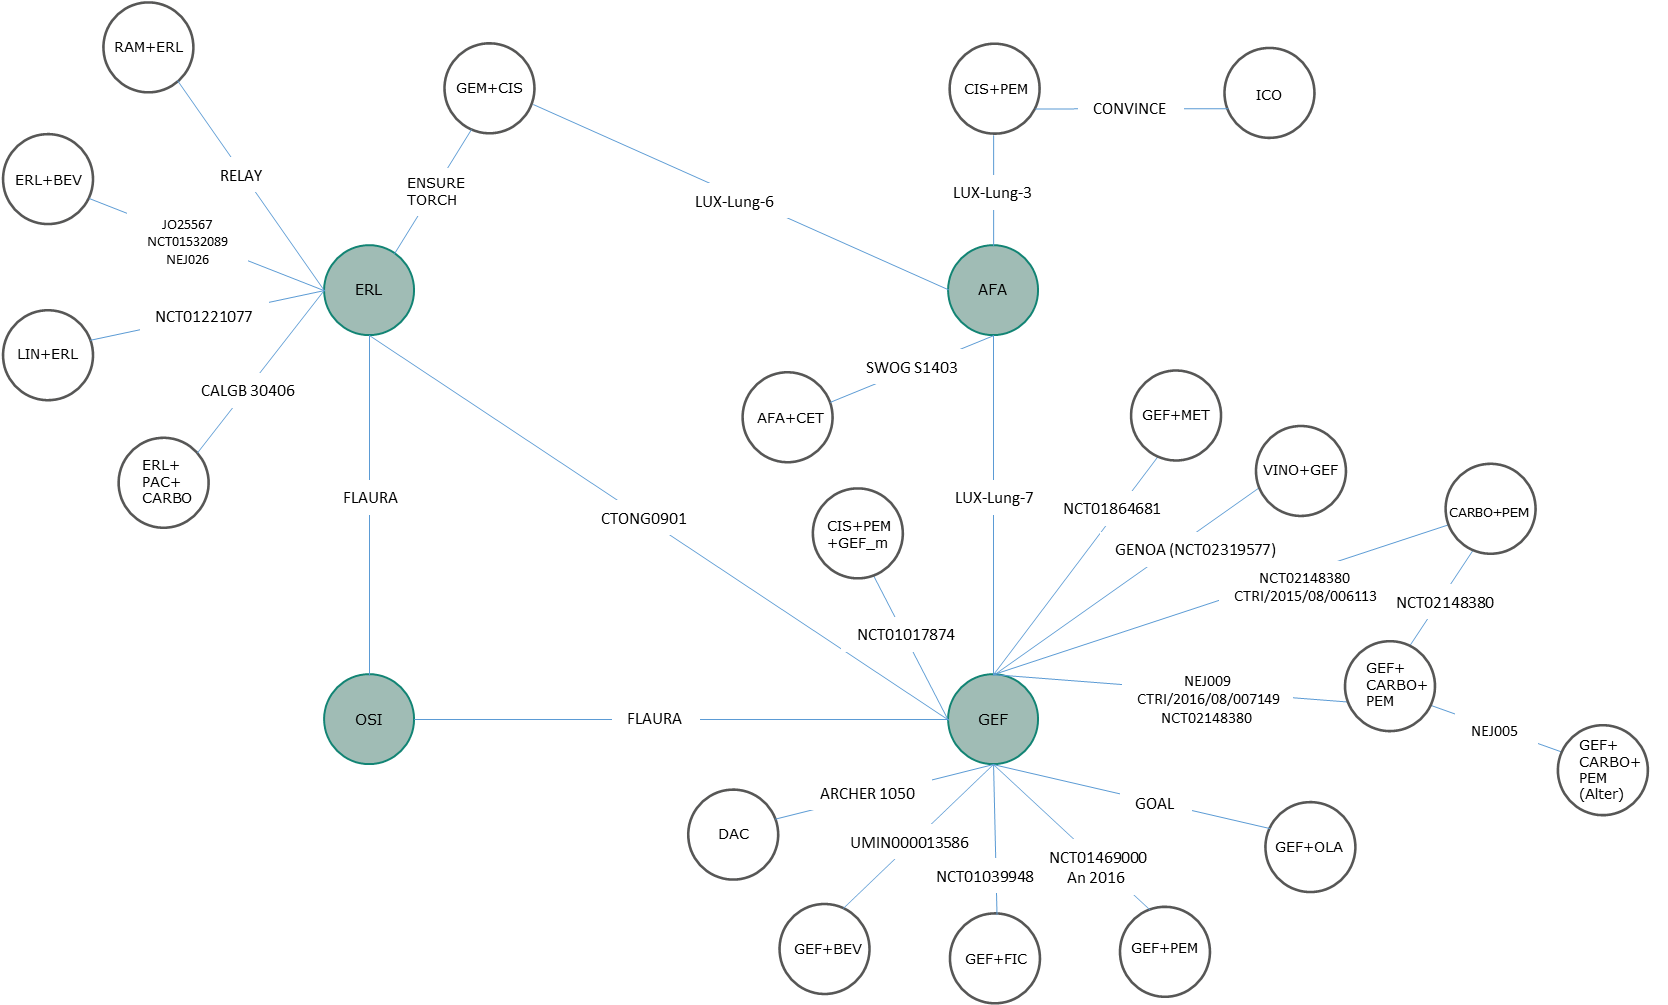


## **Figure A10. Evidence network for sensitivity analysis splitting ERL and GEF nodes for OS**

AFA: afatinib; BEV: bevacizumab; CARBO: carboplatin; CET: cetuximab; CIS: cisplatin; DAC: dacomitinib; ERL: erlotinib; FIC: ficlatuzumab; GEF: gefitinib; GEF_m: gefitinib maintenance; GEM: gemcitabine; ICO; icotinib; LIN: linsitinib; MET: metformin; OLA: olaparib; OS: overall survival; OSI: osimertinib; PAC: paclitaxel; PEM: pemetrexed; RAM: ramucirumab; VIN: vinorelbine.

# References

1. Relay. RELAY: A multinational, doubleblind, randomized Phase 3 study of erlotinib (ERL) in combination with ramucirumab (RAM) or placebo (PL) in previously untreated patients with epidermal growth factor receptor mutation-positive (EGFRm) metastatic non-small cell lung cancer (NSCLC)*.* (2019).

2. Yan BD, Meng SS, Ren J*et al*. Asthma control and severe exacerbations in patients with moderate or severe asthma in Jilin Province, China: A multicenter cross-sectional survey*.* *BMC Pulmonary Medicine,* 16 (1) (no pagination)(130), (2016).

3. Mok T, Cheng Y, Zhou X*et al*. Dacomitinib (daco) versus gefitinib (gef) for first-line treatment of advanced NSCLC (ARCHER 1050): Final overall survival (OS) analysis*.* *Journal of Clinical Oncology. Conference,* 36 (2018).

4. Nakagawa K. Dacomitinib versus gefitinib for first-line treatment of advanced EGFR+ NSCLC in Japanese Patients (ARCHER 1050)*.* *Journal of Thoracic Oncology,* 12 (11 Supplement 2) S2229-S2230 (2017).

5. Wu Y-L. First-line dacomitinib versus gefitinib in advanced non-small-cell lung cancer with EGFR mutation subgroups*.* *Journal of Thoracic Oncology,* 12 (11 Supplement 2) S1754 (2017).

6. Mok TSK, Cheng Y, Zhou X*et al*. Safety and efficacy of dacomitinib for EGFR+ NSCLC in the subgroup of Asian patients from ARCHER 1050*.* *Annals of Oncology,* 30 (Supplement 9) ix160-ix161 (2019).

7. Nishio M, Kato T, Niho S*et al*. Safety and efficacy of first-line dacomitinib in Japanese patients with advanced non-small cell lung cancer*.* *Cancer Science.,* doi:http://dx.doi.org/10.1111/cas.14384 (2020).

8. Mok TSK, Cheng Y, Zhou X*et al*. Updated overall survival (OS) from extended follow up in ARCHER 1050: A randomized phase III study comparing dacomitinib with gefitinib as first-line therapy for patients (pts) with EGFR mutations*.* *Annals of Oncology,* 30 (Supplement 9) ix200-ix201 (2019).

9. Zhou C, Wu Y-L, Chen G*et al*. BEYOND: A Randomized, Double-Blind, Placebo-Controlled, Multicenter, Phase III Study of First-Line Carboplatin/Paclitaxel Plus Bevacizumab or Placebo in Chinese Patients With Advanced or Recurrent Nonsquamous Non-Small-Cell Lung Cancer*.* *J Clin Oncol,* 33 2197-2204 (2015).

10. Jänne PA, Wang X, Socinski MA*et al*. Randomized phase II trial of erlotinib alone or with carboplatin and paclitaxel in patients who were never or light former smokers with advanced lung adenocarcinoma: CALGB 30406 trial*.* *J Clin Oncol,* 30 2063-2069 (2012).

11. Shi YK, Wang L, Han BH*et al*. First-line icotinib versus cisplatin/pemetrexed plus pemetrexed maintenance therapy for patients with advanced EGFR mutation-positive lung adenocarcinoma (CONVINCE): a phase 3, open-label, randomized study*.* *Annals of Oncology,* 28 2443-2450 (2017).

12. Crawford J, Swanson P, Schwarzenberger P*et al*. A phase 2 randomized trial of paclitaxel and carboplatin with or without panitumumab for first-line treatment of advanced non-small-cell lung cancer*.* *J Thorac Oncol,* 8 1510-1518 (2013).

13. Yang JJ, Zhou Q, Yan HH*et al*. A phase III randomised controlled trial of erlotinib vs gefitinib in advanced non-small cell lung cancer with EGFR mutations*.* *Br J Cancer,* 116 568-574 (2017).

14. Zhou QW, Y. L.Cheng, Y.Liu, Y.Chen, G.Cui, J.Yang, N.Song, Y.Li, X. L.Lu, S.Zhou, J.Ma, Z.Yu, S. Y.Huang, C.Shu, Y. CTONG 1509: Phase III study of bevacizumab with or without erlotinib in untreated Chinese patients with advanced EGFR-mutated NSCLC*.* *Annals of Oncology,* 30 (Supplement 5) v603 (2019).

15. Patil VM, Noronha V, Joshi A*et al*. Phase III study of gefitinib or pemetrexed with carboplatin in EGFR-mutated advanced lung adenocarcinoma*.* *ESMO open,* 2(1), e000168 (2017).

16. Noronha V, Joshi A, Patil VM*et al*. Phase III randomized trial comparing gefitinib to gefitinib with pemetrexed-carboplatin chemotherapy in patients with advanced untreated EGFR mutant non-small cell lung cancer (gef vs gef+C)*.* *J Clin Oncol,* 37(15_suppl), 9001-9001 (2019).

17. Noronha V, Patil VM, Joshi A*et al*. Gefitinib versus gefitinib plus pemetrexed and carboplatin chemotherapy in EGFR-mutated lung cancer*.* *J Clin Oncol,* 38(2), 124-136 (2019).

18. Wu YL, Zhou C, Liam CK*et al*. First-line erlotinib versus gemcitabine/cisplatin in patients with advanced EGFR mutation-positive non-small-cell lung cancer: analyses from the phase III, randomized, open-label, ENSURE study*.* *Annals of Oncology,* 26 1883-1889 (2015).

19. Wu Y-L, Zhou C, Lu S*et al*. Erlotinib versus gemcitabine/cisplatin in Chinese patients with EGFR mutation-positive advanced non-small-cell lung cancer: Crossover extension and post-hoc analysis of the ENSURE study*.* *Lung Cancer,* 130 18-24 (2019).

20. Wu Y-L, Zhou C, Wu G*et al*. Quality of life (QOL) analysis from ensure, a phase 3, open-label study of first-line erlotinib versus gemcitabine/cisplatin (GP) in asian patients with epidermal growth factor receptor (EGFR) mutation-positive (MUT+) non-small-cell lung cancer (NSCLC)*.* *Journal of Thoracic Oncology,* 1) S37 (2014).

21. Rosell R, Carcereny E, Gervais R*et al*. Erlotinib versus standard chemotherapy as first-line treatment for European patients with advanced EGFR mutation-positive non-small-cell lung cancer (EURTAC): a multicentre, open-label, randomised phase 3 trial*.* *Lancet Oncology,* 13 239-246 (2012).

22. Marinis FD, Vergnenegre A, Passaro A*et al*. Erlotinib-associated rash in patients with EGFR mutation-positive non-small-cell lung cancer treated in the EURTAC trial*.* *Future Oncology,* 11 421-429 (2015).

23. Wu Y-L, Lee JS, Thongprasert S*et al*. Intercalated combination of chemotherapy and erlotinib for patients with advanced stage non-small-cell lung cancer (FASTACT-2): a randomised, double-blind trial*.* *Lancet Oncology,* 14 777-786 (2013).

24. Mok T, Ladrera G, Srimuninnimit V*et al*. Tumor marker analyses from the phase III, placebo-controlled, FASTACT-2 study of intercalated erlotinib with gemcitabine/platinum in the first-line treatment of advanced non-small-cell lung cancer*.* *Lung Cancer,* 98 43678 (2016).

25. Soria JC, Ohe Y, Vansteenkiste J*et al*. Osimertinib in Untreated EGFR-Mutated Advanced Non-Small-Cell Lung Cancer*.* *N Engl J Med,* 378 113-125 (2018).

26. Cho BC, Chewaskulyong B, Lee KH*et al*. Osimertinib versus Standard of Care EGFR TKI as First-Line Treatment in Patients with EGFRm Advanced NSCLC: FLAURA Asian Subset*.* *Journal of Thoracic Oncology,* 14 99-106 (2019).

27. Gray J, Okamoto I, Sriuranpong V. Osimertinib vs SoC EGFR-TKI as first-line treatment in patients with EGFRm advanced NSCLC (FLAURA): Plasma ctDNA analysis*.* *Journal of Thoracic Oncology,* 12 (11 Supplement 2) S1754-S1755 (2017).

28. Leighl N, Karaseva N, Nakagawa K*et al*. Patient-reported outcomes from FLAURA: Osimertinib versus standard of care (SoC) epidermal growth factor receptor tyrosine kinase inhibitor (EGFR-TKI) in patients with EGFR-mutated advanced non-small cell lung cancer (NSCLC)*.* *Journal of Thoracic Oncology,* 13 (4 Supplement 1) S81-S82 (2018).

29. Planchard D, Boyer MJ, Lee J-S*et al*. Osimertinib vs standard of care (SoC) EGFRTKI as first-line therapy in patients (pts) with untreated EGFRm advanced NSCLC: FLAURA post-progression outcomes*.* *Journal of Thoracic Oncology,* 13 (4 Supplement 1) S72-S73 (2018).

30. Reungwetwattana T, Nakagawa K, Cho BC*et al*. CNS response to osimertinib versus standard epidermal growth factor receptor tyrosine kinase inhibitors in patients with untreated EGFR-mutated advanced non-small-cell lung cancer*.* *J Clin Oncol,* 36 3290-3297 (2018).

31. Zhou C, Cheng Y, He Y*et al*. Osimertinib vs Standard of Care (SoC) EGFR-TKI as First-Line Treatment in Chinese Patients With EGFRm Advanced NSCLC*.* *Journal of Thoracic Oncology,* 13 (10 Supplement) S507-S508 (2018).

32. Reinmuth N, Bischoff H, Bohnet S*et al*. Osimertinib vs comparator EGFR-TKI as first-line treatment for EGFRM advanced NSCLC (Flaura): Final overall survival analysis*.* *Oncology Research and Treatment,* 43 (Supplement 1) 116 (2020).

33. Ramalingam SS, Vansteenkiste J, Planchard D*et al*. Overall Survival with Osimertinib in Untreated, EGFR-Mutated Advanced NSCLC*.* *N Engl J Med,* 382(1), 41-50 (2020).

34. Ohe Y, Imamura F, Nogami N*et al*. Osimertinib versus standard-of-care EGFR-TKI as first-line treatment for EGFRm advanced NSCLC: FLAURA Japanese subset*.* *Jpn J Clin Oncol,* 49(1), 29-36 (2019).

35. Leighl NB, Karaseva N, Nakagawa K*et al*. Patient-reported outcomes from FLAURA: Osimertinib versus erlotinib or gefitinib in patients with EGFR-mutated advanced non-small-cell lung cancer*.* *Eur J Cancer,* 125 49-57 (2020).

36. Planchard D, Boyer MJ, Lee JS*et al*. Postprogression Outcomes for Osimertinib versus Standard-of-Care EGFR-TKI in Patients with Previously Untreated EGFR-mutated Advanced Non-Small Cell Lung Cancer*.* *Clin Cancer Res,* 25(7), 2058-2063 (2019).

37. Genova C, Rossi G, Pezzuto A*et al*. P2.14-02 Interim Survival Analysis of Gefitinib Plus Vinorelbine in Advanced EGFR-Mutant Non-Small Cell Lung Cancer (Genoa Trial)*.* *Journal of Thoracic Oncology,* 14 (10 Supplement) S829-S830 (2019).

38. Campelo. Combination of gefitinib and olaparib versus gefitinib alone in EGFR mutant non-small-cell lung cancer (NSCLC): A randomized phase 2 study (GOAL, Spanish Lung Cancer Group)*.* *Journal of Clinical Oncology. Conference,* 36 (2018).

39. Cortot AB, Madroszyk A, Leprieur EG*et al*. Phase II randomized trial of afatinib with or without cetuximab as first-line treatment for EGFR mutated non-small cell lung cancer (NSCLC) patients (IFCT-1503 ACE-Lung)*.* *J Clin Oncol,* 37(15_suppl), 9079-9079 (2019).

40. Li X, Zhang L, Da J*et al*. High-Dose Icotinib in Advanced Non-Small Cell Lung Cancer with EGFR 21 L858R Mutation: The Randomized, Open-Label INCREASE Study*.* *Journal of Thoracic Oncology,* 13 (10 Supplement) S810 (2018).

41. Thomas M, Fischer J, Andreas S*et al*. Erlotinib and bevacizumab versus cisplatin, gemcitabine and bevacizumab in unselected nonsquamous nonsmall cell lung cancer*.* *Eur Respir J,* 46 219-229 (2015).

42. Mok TS, Wu Y-L, Thongprasert S*et al*. Gefitinib or carboplatin-paclitaxel in pulmonary adenocarcinoma*.* *N Engl J Med,* 361 947-957 (2009).

43. Fukuoka M, Wu Y-L, Thongprasert S*et al*. Biomarker analyses and final overall survival results from a phase III, randomized, open-label, first-line study of gefitinib versus carboplatin/paclitaxel in clinically selected patients with advanced non-small-cell lung cancer in Asia (IPASS)*.* *J Clin Oncol,* 29 2866-2874 (2011).

44. Goto K, Ichinose Y, Ohe Y*et al*. Epidermal growth factor receptor mutation status in circulating free DNA in serum: from IPASS, a phase III study of gefitinib or carboplatin/paclitaxel in non-small cell lung cancer*.* *J Thorac Oncol,* 7 115-121 (2012).

45. Thongprasert S, Duffield E, Saijo N*et al*. Health-related quality-of-life in a randomized phase III first-line study of gefitinib versus carboplatin/paclitaxel in clinically selected patients from Asia with advanced NSCLC (IPASS)*.* *J Thorac Oncol,* 6 1872-1880 (2011).

46. Wu YL, Saijo N, Thongprasert S*et al*. Efficacy according to blind independent central review: Post-hoc analyses from the phase III, randomized, multicenter, IPASS study of first-line gefitinib versus carboplatin/paclitaxel in Asian patients with EGFR mutation-positive advanced NSCLC*.* *Lung Cancer,* 104 119-125 (2017).

47. Wu Y-L, Fukuoka M, Mok TSK*et al*. Tumor response and health-related quality of life in clinically selected patients from Asia with advanced non-small-cell lung cancer treated with first-line gefitinib: post hoc analyses from the IPASS study*.* *Lung Cancer,* 81 280-287 (2013).

48. Abe T, Takeda K, Ohe Y*et al*. Randomized phase III trial comparing weekly docetaxel plus cisplatin versus docetaxel monotherapy every 3 weeks in elderly patients with advanced non-small-cell lung cancer: The intergroup trial JCOG0803/WJOG4307L*.* *J Clin Oncol,* 33 575-581 (2015).

49. Takeda K. Final overall survival results of a randomized phase III trial comparing weekly docetaxel plus cisplatin (DP) with 3-weekly docetaxel (D) monotherapy in elderly patients (pts) with advanced non-small-cell lung cancer (NSCLC): Intergroup trial JCOG0803/WJOG4307L*.* *J Clin Oncol,* 33 CONFERENCE START: 2015 May 2029 CONFERENCE END: 2015 Jun 2012 (2015).

50. Seto T, Kato T, Nishio M*et al*. Erlotinib alone or with bevacizumab as first-line therapy in patients with advanced non-squamous non-small-cell lung cancer harbouring EGFR mutations (JO25567): an open-label, randomised, multicentre, phase 2 study*.* *Lancet Oncology,* 15 1236-1244 (2014).

51. Kato T, Seto T, Nishio M*et al*. Erlotinib Plus Bevacizumab Phase ll Study in Patients with Advanced Non-small-Cell Lung Cancer (JO25567): Updated Safety Results*.* *Drug Safety,* 41 229-237 (2018).

52. Kato T, Seto T, Nishio M*et al*. Erlotinib plus bevacizumab (EB) versus erlotinib alone (E) as first-line treatment for advanced EGFR mutation-positive nonsquamous non-small cell lung cancer (NSCLC): An open-label randomized trial*.* *Journal of Clinical Oncology. Conference,* 32 (2014).

53. Seto T. Erlotinib plus bevacizumab (EB) versus erlotinib alone (E) as first-line treatment for advanced EGFR mutation-positive nonsquamous non-small-cell lung cancer (NSCLC): Survival follow-up results of JO25567*.* *Journal of Clinical Oncology. Conference,* 36 (2018).

54. Kubota K, Yoshioka H, Oshita F*et al*. Phase III, Randomized, Placebo-Controlled, Double-Blind Trial of Motesanib (AMG-706) in Combination With Paclitaxel and Carboplatin in East Asian Patients With Advanced Nonsquamous Non-Small-Cell Lung Cancer*.* *J Clin Oncol,* 35 3662-3670 (2017).

55. Yang JCG, S. M.Sequist, L. V.Wu, C. L.Papadimitrakopoulou, V. A.Su, W. C.Fiore, J.Saraf, S.Raftopoulos, H.Patnaik, A. Pembrolizumab in Combination With Erlotinib or Gefitinib as First-Line Therapy for Advanced NSCLC With Sensitizing EGFR Mutation*.* *J Thorac Oncol,* 14(3), 553-559 (2019).

56. Sequist LV, Yang JC-H, Yamamoto N*et al*. Phase III study of afatinib or cisplatin plus pemetrexed in patients with metastatic lung adenocarcinoma with EGFR mutations*.* *J Clin Oncol,* 31 3327-3334 (2013).

57. Kato T, Yoshioka H, Okamoto I*et al*. Afatinib versus cisplatin plus pemetrexed in Japanese patients with advanced non-small cell lung cancer harboring activating EGFR mutations: Subgroup analysis of LUX-Lung 3*.* *Cancer Sci,* 106 1202-1211 (2015).

58. Yang JC-H, Hirsh V, Schuler M*et al*. Symptom control and quality of life in LUX-Lung 3: a phase III study of afatinib or cisplatin/pemetrexed in patients with advanced lung adenocarcinoma with EGFR mutations*.* *J Clin Oncol,* 31 3342-3350 (2013).

59. Yang JC-H, Srimuninnimit V, Ahn M-J*et al*. First-Line Afatinib versus Chemotherapy in Patients with Non-Small Cell Lung Cancer and Common Epidermal Growth Factor Receptor Gene Mutations and Brain Metastases*.* *J Thorac Oncol,* 11 380-390 (2016).

60. Schuler M, Wang J, Sequist LV*et al*. Overall survival (OS) with afatinib (A) vs chemotherapy (CT) in patients (PTS) with NSCLC harbouring EGFR mutations (MUT): Subgroup analyses by race in lux-lung 3 (LL3) and lux-lung 6 (LL6)*.* *Annals of oncology,* 26 (2015).

61. Yang JC-H, Wu Y-L, Schuler M*et al*. Afatinib versus cisplatin-based chemotherapy for EGFR mutation-positive lung adenocarcinoma (LUX-Lung 3 and LUX-Lung 6): analysis of overall survival data from two randomised, phase 3 trials*.* *Lancet Oncology,* 16 141-151 (2015).

62. Schuler M, Paz-Ares L, Sequist LV*et al*. First-line afatinib for advanced EGFR mutation-positive (EGFRm+) NSCLC: Analysis of long-term responders in the Phase III LUX-Lung 3, 6 and 7 trials*.* *Eur J Cancer,* 72 (Supplement 1) S176-S177 (2017).

63. Schuler M. First-line afatinib in patients with EGFR mutation-positive (EGFRm+) non-small-cell lung cancer (NSCLC): Analysis of long-term responders (LTRs) in the LUX-Lung 3, 6 and 7 trials*.* *Oncology Research and Treatment,* 40 (Supplement 3) 172 (2017).

64. Wu Y-L, Sequist LV, Tan E-H*et al*. Afatinib as First-line Treatment of Older Patients With EGFR Mutation-Positive Non-Small-Cell Lung Cancer: Subgroup Analyses of the LUX-Lung 3, LUX-Lung 6, and LUX-Lung 7 Trials*.* *Clinical lung cancer,* 19 e465-e479 (2018).

65. Wu Y-L, Hirsh V, Sequist LV*et al*. Does EGFR Mutation Type Influence Patient-Reported Outcomes in Patients with Advanced EGFR Mutation-Positive Non-Small-Cell Lung Cancer? Analysis of Two Large, Phase III Studies Comparing Afatinib with Chemotherapy (LUX-Lung 3 and LUX-Lung 6)*.* *Patient,* 11 131-141 (2018).

66. Schuler M, Paz-Ares L, Sequist LV*et al*. First-line afatinib for advanced EGFRm+ NSCLC: Analysis of long-term responders in the LUX-Lung 3, 6, and 7 trials*.* *Lung Cancer,* 133 10-19 (2019).

67. Wu Y-L, Zhou C, Hu C-P*et al*. Afatinib versus cisplatin plus gemcitabine for first-line treatment of Asian patients with advanced non-small-cell lung cancer harbouring EGFR mutations (LUX-Lung 6): an open-label, randomised phase 3 trial*.* *Lancet Oncology,* 15 213-222 (2014).

68. Geater SL, Xu C-R, Zhou C*et al*. Symptom and Quality of Life Improvement in LUX-Lung 6: An Open-Label Phase III Study of Afatinib Versus Cisplatin/Gemcitabine in Asian Patients With EGFR Mutation-Positive Advanced Non-small-cell Lung Cancer*.* *J Thorac Oncol,* 10 883-889 (2015).

69. Wu Y, Xu C, Hu C*et al*. Afatinib versus gemcitabine/cisplatin for first-line treatment of Chinese patients with advanced non-small-cell lung cancer harboring EGFR mutations: subgroup analysis of the LUX-Lung 6 trial*.* *Onco Targets Ther,* 11 8575-8587 (2018).

70. Park K, Tan E-H, O'byrne K*et al*. Afatinib versus gefitinib as first-line treatment of patients with EGFR mutation-positive non-small-cell lung cancer (LUX-Lung 7): a phase 2B, open-label, randomised controlled trial*.* *Lancet Oncology,* 17 577-589 (2016).

71. Corral J, Park K, Yang J. Afatinib (A) vs gefitinib (G) in patients with EGFR mutation-positive (EGFRm1) NSCLC: Updated OS data from the phase IIb trial LUX-Lung 7 (LL7)*.* *Annals of Oncology,* 28 (Supplement 2) iii34 (2017).

72. O'byrne K, Yang J, Paz-Ares L. Afatinib vs Gefitinib in patients with EGFRM+ NSCLC: Analysis of time to treatment failure and impact of afatinib dose adjustment*.* *Asia-Pacific Journal of Clinical Oncology,* 14 (Supplement 3) 68-69 (2018).

73. Paz-Ares L, Tan EH, O’byrne K*et al*. Afatinib versus gefitinib in patients with EGFR mutation-positive advanced non-small-cell lung cancer: overall survival data from the phase IIb LUX-Lung 7 trial*.* *Annals of Oncology,* 28 270-277 (2017).

74. Schuler M, Tan E-H, O’byrne K*et al*. First-line afatinib vs gefitinib for patients with EGFR mutation-positive NSCLC (LUX-Lung 7): impact of afatinib dose adjustment and analysis of mode of initial progression for patients who continued treatment beyond progression*.* *Journal of Cancer Research and Clinical Oncology.,* doi:http://dx.doi.org/10.1007/s00432-019-02862-x (2019).

75. Hirsch FR, Kabbinavar F, Eisen T*et al*. A randomized, phase II, biomarker-selected study comparing erlotinib to erlotinib intercalated with chemotherapy in first-line therapy for advanced non-small-cell lung cancer*.* *J Clin Oncol,* 29 3567-3573 (2011).

76. Yang JC-H, Kang JH, Mok T*et al*. First-line pemetrexed plus cisplatin followed by gefitinib maintenance therapy versus gefitinib monotherapy in East Asian patients with locally advanced or metastatic non-squamous non-small cell lung cancer: a randomised, phase 3 trial*.* *Eur J Cancer,* 50 2219-2230 (2014).

77. Yang JC-H, Srimuninnimit V, Ahn M-J*et al*. First-Line Pemetrexed plus Cisplatin followed by Gefitinib Maintenance Therapy versus Gefitinib Monotherapy in East Asian Never-Smoker Patients with Locally Advanced or Metastatic Nonsquamous Non-Small Cell Lung Cancer: Final Overall Survival Results from a Randomized Phase 3 Study*.* *J Thorac Oncol,* 11 370-379 (2016).

78. Mok TSK, Geater SL, Su W-C*et al*. A Randomized Phase 2 Study Comparing the Combination of Ficlatuzumab and Gefitinib with Gefitinib Alone in Asian Patients with Advanced Stage Pulmonary Adenocarcinoma*.* *J Thorac Oncol,* 11 1736-1744 (2016).

79. Zhao W, Liu X, Tian Q*et al*. Randomized phase II study of erlotinib as first-line or second-line therapy for EGFR mutation-positive advanced lung adenocarcinoma patients*.* *Biomedical Research (India),* 28 1917-1921 (2017).

80. Chen Y-M, Tsai C-M, Fan W-C*et al*. Phase II randomized trial of erlotinib or vinorelbine in chemonaive, advanced, non-small cell lung cancer patients aged 70 years or older*.* *J Thorac Oncol,* 7 412-418 (2012).

81. Leighl NB, Rizvi NA, De Lima LG*et al*. Phase 2 Study of Erlotinib in Combination With Linsitinib (OSI-906) or Placebo in Chemotherapy-Naive Patients With Non-Small-Cell Lung Cancer and Activating Epidermal Growth Factor Receptor Mutations*.* *Clinical lung cancer,* 18 34-42.e32 (2017).

82. Cheng Y, Murakami H, Yang P-C*et al*. Randomized Phase II Trial of Gefitinib With and Without Pemetrexed as First-Line Therapy in Patients With Advanced Nonsquamous Non-Small-Cell Lung Cancer With Activating Epidermal Growth Factor Receptor Mutations*.* *J Clin Oncol,* 34 3258-3266 (2016).

83. Yang J, Cheng Y, Murakami H*et al*. Randomized phase 2 trial of gefitinib with and without pemetrexed as first-line therapy in East Asian patients with advanced, epidermal growth factor receptor (EGFR) mutation-positive (mt+), nonsquamous (NS) non-small cell lung cancer (NSCLC): Translational research and interim overall survival (OS)*.* *Annals of Oncology. Conference: 41st European Society for Medical Oncology Congress, ESMO,* 27 (2016).

84. Yang JC-H, Cheng Y, Murakami H*et al*. A Randomized Phase 2 Study of Gefitinib With or Without Pemetrexed as First-line Treatment in Nonsquamous NSCLC With EGFR Mutation: Final Overall Survival and Biomarker Analysis*.* *Journal of Thoracic Oncology,* 15(1), 91-100 (2020).

85. Lee LS, Lee YJ, Kim HY*et al*. Randomized phase II trial of intercalated gefitinib (G) and pemetrexed/cisplatin (Pem/Cis) for never-smokers with chemo-naive stage IIIB/IV lung adenocarcinoma (LADC)*.* *Journal of Clinical Oncology. Conference,* 34 (2016).

86. Stinchcombe T, Janne P, Wang X*et al*. 1444P A randomized phase II trial of erlotinib or erlotinib and bevacizumab in patients with advanced EGFR mutant non-small cell lung cancer (NSCLC)*.* *Annals of Oncology,* 29(suppl_8), mdy292. 066 (2018).

87. Stinchcombe TE, Jänne PA, Wang X*et al*. Effect of Erlotinib Plus Bevacizumab vs Erlotinib Alone on Progression-Free Survival in Patients With Advanced EGFR-Mutant Non-Small Cell Lung Cancer: A Phase 2 Randomized Clinical Trial*.* *JAMA Oncol,* 08 08 (2019).

88. Sun S, Jiao SC, Fang J*et al*. Icotinib as first-line or maintenance therapy in patients with advanced lung adenocarcinoma with positive EGFR mutation and the influence of cytokines shift on survival*.* *Journal of Clinical Oncology. Conference,* 35 (2017).

89. Yu H, Zhang J, Wu X*et al*. A phase II randomized trial evaluating gefitinib intercalated with pemetrexed/platinum chemotherapy or pemetrexed/platinum chemotherapy alone in unselected patients with advanced non-squamous non-small cell lung cancer*.* *Cancer Biol Ther,* 15 832-839 (2014).

90. Qin SY, H.Wu, X.Luo, Z.Wang, H.Sun, S.Huang, M.Jin, J.Tao, Z.Qiao, J.Feng, Y.Wang, J.Chang, J. Weekly albumin-bound paclitaxel/cisplatin versus gemcitabine/cisplatin as first-line therapy for patients with advanced non-small-cell lung cancer: A phase II open-label clinical study*.* *Chin,* 31(2), 339-348 (2019).

91. Li L, Jiang L, Wang Y*et al*. Combination of Metformin and Gefitinib as First-Line Therapy for Nondiabetic Advanced NSCLC Patients with EGFR Mutations: A Randomized, Double-Blind Phase II Trial*.* *Clin Cancer Res,* 25(23), 6967-6975 (2019).

92. He Y, Li L, Jiang L*et al*. Combination of metformin and gefitinib as first-line therapy for nondiabetic advanced non-small cell lung cancer (NSCLC) patients with epidermal growth factor receptor (EGFR) mutations: A multicenter, randomized, double-blind, placebo-controlled phase II trial*.* *Journal of Clinical Oncology. Conference,* 37(Supplement 15), (2019).

93. Scagliotti G, Moro-Sibilot D, Kollmeier J*et al*. A randomized, controlled, open label phase II study of erlotinib (E) with or without the MET antibody emibetuzumab (Emi) as first-line treatment for EGFRmt non-small cell lung cancer (NSCLC) patients who have disease control after an 8-week lead-in treatment with erlotinib*.* *Journal of Clinical Oncology. Conference,* 35 (2017).

94. Scagliotti G, Moro-Sibilot D, Kollmeier J*et al*. A Randomized-Controlled Phase 2 Study of the MET Antibody Emibetuzumab in Combination with Erlotinib as First-Line Treatment for EGFR Mutation-Positive NSCLC Patients*.* *Journal of Thoracic Oncology,* 15(1), 80-90 (2020).

95. Han B, Jin B, Chu T*et al*. Combination of chemotherapy and gefitinib as first-line treatment for patients with advanced lung adenocarcinoma and sensitive EGFR mutations: A randomized controlled trial*.* *Int J Cancer,* 141 1249-1256 (2017).

96. Zhang W, Xu J, Lou Y, Zhang Y, Han B. OA11.07 Chemotherapy Plus EGFR-TKI as First-Line Treatment Provides Better Survival for EGFR Mutation NSCLC Patients: Update Data for NCT02148380*.* *Journal of Thoracic Oncology,* 14 (10 Supplement) S236 (2019).

97. Kelly RJ, Shepherd FA, Krivoshik A, Jie F, Horn L. A phase III, randomized, open-label study of ASP8273 versus erlotinib or gefitinib in patients with advanced stage IIIB/IV non-small-cell lung cancer*.* *Annals of Oncology,* 30(7), 1127-1133 (2019).

98. Inoue A, Kobayashi K, Maemondo M*et al*. Updated overall survival results from a randomized phase III trial comparing gefitinib with carboplatin-paclitaxel for chemo-naive non-small cell lung cancer with sensitive EGFR gene mutations (NEJ002)*.* *Annals of Oncology,* 24 54-59 (2013).

99. Mitsudomi T, Morita S, Yatabe Y*et al*. Gefitinib or chemotherapy for non-small-cell lung cancer with mutated EGFR*.* *N Engl J Med,* 362 2380-2388 (2010).

100. Sugawara S, Oizumi S, Minato K*et al*. Randomized phase II study of concurrent versus sequential alternating gefitinib and chemotherapy in previously untreated non-small cell lung cancer with sensitive EGFR mutations: NEJ005/TCOG0902*.* *Annals of Oncology,* 26 888-894 (2015).

101. Oizumi S, Sugawara S, Minato K*et al*. Updated survival outcomes of NEJ005/TCOG0902, a randomized phase II study of concurrent (C) versus sequential alternating (S) gefitinib and chemotherapy in previously untreated non-small cell lung cancer (NSCLC) with sensitive epidermal growth factor receptor (EGFR) mutations*.* *Journal of Clinical Oncology. Conference,* 35 (2017).

102. Nakamura A, Inoue A, Morita S*et al*. Phase III study comparing gefitinib monotherapy (G) to combination therapy with gefitinib, carboplatin, and pemetrexed (GCP) for untreated patients (pts) with advanced non-small cell lung cancer (NSCLC) with EGFR mutations (NEJ009)*.* *Journal of Clinical Oncology. Conference,* 36 (2018).

103. Hosomi Y, Morita S, Sugawara S*et al*. Gefitinib alone versus gefitinib plus chemotherapy for non-small-cell lung cancer with mutated epidermal growth factor receptor: NEJ009 study*.* *J Clin Oncol,* 38(2), 115-123 (2020).

104. Kawashima1 Y, Fukuhara T, Furuya N*et al*. 1441P Phase III study comparing bevacizumab plus erlotinib (BE) to erlotinib (E) in patients (pts) with untreated NSCLC harboring EGFR mutations: NEJ026*.* *Annals of Oncology,* 29(suppl_8), mdy292. 063 (2018).

105. Saito H, Fukuhara T, Furuya N*et al*. Erlotinib plus bevacizumab versus erlotinib alone in patients with EGFR-positive advanced non-squamous non-small-cell lung cancer (NEJ026): interim analysis of an open-label, randomised, multicentre, phase 3 trial*.* *Lancet Oncology,* 20(5), 625-635 (2019).

106. Maemondo M, Fukuhara T, Saito H*et al*. NEJ026: Final overall survival analysis of bevacizumab plus erlotinib treatment for NSCLC patients harboring activating EGFR-mutations*.* *J Clin Oncol,* 38(15_suppl), 9506-9506 (2020).

107. Zhou C, Wu Y-L, Chen G*et al*. Erlotinib versus chemotherapy as first-line treatment for patients with advanced EGFR mutation-positive non-small-cell lung cancer (OPTIMAL, CTONG-0802): a multicentre, open-label, randomised, phase 3 study*.* *Lancet Oncology,* 12 735-742 (2011).

108. Chen G, Feng J, Zhou C*et al*. Quality of life (QoL) analyses from OPTIMAL (CTONG-0802), a phase III, randomised, open-label study of first-line erlotinib versus chemotherapy in patients with advanced EGFR mutation-positive non-small-cell lung cancer (NSCLC)*.* *Annals of Oncology,* 24 1615-1622 (2013).

109. Zhou C, Wu YL, Chen G*et al*. Final overall survival results from a randomised, phase III study of erlotinib versus chemotherapy as first-line treatment of EGFR mutation-positive advanced non-small-cell lung cancer (OPTIMAL, CTONG-0802)*.* *Annals of Oncology,* 26 1877-1883 (2015).

110. Prabhash K. Pemetrexed versus gefitinib in EGFR mutation positive lung cancer: Results of a phase 3 study from India*.* *Journal of Thoracic Oncology,* 12 (1 Supplement 1) S1246 (2017).

111. Prabhash K, Noronha V, Patil V, Joshi A, Chougule A. P1.01-88 PS 2 Patients with Advanced EGFR Mutant NSCLC: Subset Analysis of a Phase III Randomized Trial Comparing Gefitinib to Gefitinib with Chemotherapy*.* *Journal of Thoracic Oncology,* 14 (10 Supplement) S395 (2019).

112. Prabhash K, Noronha V, Patil V*et al*. P2.01-102 Outcome of Patients with EGFR Exon 19 Mutation in a Phase III Randomized Trial Comparing Gefitinib to Gefitinib with Chemotherapy*.* *Journal of Thoracic Oncology,* 14 (10 Supplement) S681 (2019).

113. Singh C. Gefitinib in treatment of metastatic non-small cell lung cancer (NSCLC) with mutated epidermal growth factor receptor (EGFR)*.* *Journal for ImmunoTherapy of Cancer,* 2 CONFERENCE START: 2014 Nov 2016 CONFERENCE END: 2014 Nov 2019 (2014).

114. Goldberg S, Redman M, Lilenbaum R*et al*. Afatinib With or Without Cetuximab for EGFR-Mutant Non-Small Cell Lung Cancer: Safety and Efficacy Results from SWOG S1403*.* *Journal of Thoracic Oncology,* 13 (10 Supplement) S343-S344 (2018).

115. Lee SM, Khan I, Upadhyay S*et al*. First-line erlotinib in patients with advanced non-small-cell lung cancer unsuitable for chemotherapy (TOPICAL): a double-blind, placebo-controlled, phase 3 trial*.* *Lancet Oncology,* 13 1161-1170 (2012).

116. Gridelli C, Ciardiello F, Gallo C*et al*. First-line erlotinib followed by second-line cisplatin-gemcitabine chemotherapy in advanced non-small-cell lung cancer: the TORCH randomized trial*.* *J Clin Oncol,* 30 3002-3011 (2012).

117. Di Maio M, Leighl NB, Gallo C*et al*. Quality of life analysis of TORCH, a randomized trial testing first-line erlotinib followed by second-line cisplatin/gemcitabine chemotherapy in advanced non-small-cell lung cancer*.* *J Thorac Oncol,* 7 1830-1844 (2012).

118. Kitagawa C, Mori M, Ichiki M*et al*. Gefitinib plus bevacizumab vs. Gefitinib Alone for EGFR Mutant Non-squamous Non-small Cell Lung Cancer*.* *In Vivo,* 33 477-482 (2019).

119. Mitsudomi T, Morita S, Yatabe Y*et al*. Gefitinib versus cisplatin plus docetaxel in patients with non-small-cell lung cancer harbouring mutations of the epidermal growth factor receptor (WJTOG3405): an open label, randomised phase 3 trial*.* *Lancet Oncology,* 11 121-128 (2010).

120. Yoshioka H, Mitsudomi T, Morita S*et al*. Final overall survival results of WJTOG 3405, a randomized phase 3 trial comparing gefitinib (G) with cisplatin plus docetaxel (CD) as the first-line treatment for patients with non-small cell lung cancer (NSCLC) harboring mutations of the epidermal growth factor receptor (EGFR)*.* *Journal of Clinical Oncology. Conference,* 32 (2014).

121. Yoshioka H, Shimokawa M, Seto T*et al*. Final overall survival results of WJTOG3405, a randomized phase III trial comparing gefitinib versus cisplatin with docetaxel as the first-line treatment for patients with stage IIIB/IV or postoperative recurrent EGFR mutation-positive non-small-cell lung cancer*.* *Annals of oncology : official journal of the European Society for Medical Oncology,* 30(12), 1978-1984 (2019).

122. Xie Y. [Gefitinib versus Erlotinib as first-line treatment for patients with advanced EGFR mutation-positive non-small-cell lung cancer]*.* *Nan Fang Yi Ke Da Xue Xue Bao,* 35 446-449 (2015).

123. Nakagawa K, Garon EB, Seto T*et al*. Ramucirumab plus erlotinib in patients with untreated, EGFR-mutated, advanced non-small-cell lung cancer (RELAY): a randomised, double-blind, placebo-controlled, phase 3 trial*.* *The Lancet Oncology,* 20(12), 1655-1669 (2019).

124. Wu Y-L, Cheng Y, Zhou X*et al*. Dacomitinib versus gefitinib as first-line treatment for patients with EGFR-mutation-positive non-small-cell lung cancer (ARCHER 1050): a randomised, open-label, phase 3 trial*.* *Lancet Oncology,* 18 1454-1466 (2017).

125. Cortot A, Madroszyk A, Giroux Leprieur E*et al*. Phase II randomized trial of afatinib with or without cetuximab as first-line treatment for EGFR mutated non-small cell lung cancer (NSCLC) patients (IFCT-1503 ACE-Lung)*.* *Journal of Clinical Oncology. Conference,* 37(Supplement 15), (2019).

126. Scagliotti G, Morosibilot D, Kollmeier J*et al*. A Randomized-Controlled Phase 2 Study of the MET Antibody Emibetuzumab in Combination with Erlotinib as First-line Treatment for EGFR-mutation Positive NSCLC Patients*.* *Journal of thoracic oncology,*  (2019).
